# Elucidating interplay of speed and accuracy in biological error correction

Kinshuk Banerjee<sup>a</sup>, Anatoly B. Kolomeisky<sup>a,b,1,2</sup>, and Oleg A. Igoshin<sup>a,c,1,2</sup>

<sup>a</sup>Center for Theoretical Biological Physics, Rice University, Houston; <sup>b</sup>Department of Chemistry, Rice University, Houston, 77005; <sup>c</sup>Department of Bioengineering, Rice University, Houston, 77005

This manuscript was compiled on January 23, 2017

**One of the most fascinating features of biological systems is the ability to sustain high accuracy of all major cellular processes despite the stochastic nature of underlying chemical processes. It is widely believed that such low errors are the result of the error correcting mechanism known as kinetic proofreading. However, it is usually argued that enhancing the accuracy should result in slowing down the process leading to so-called speed-accuracy trade-off. We developed a discrete-state stochastic framework that allowed us to investigate the mechanisms of the proofreading using the method of first-passage processes. With this framework, we simultaneously analyzed speed and accuracy of the two fundamental biological processes, DNA replication and tRNA selection during the translation. The results indicate that speed-accuracy trade-off is not always observed. However, when the trade-off is present, the biological systems tend to optimize the speed rather than the accuracy of the processes, as long as the error level is tolerable. Additional constraints due to the energetic cost of proofreading also play a role in the error correcting process. Our theoretical findings provide a new microscopic picture of how complex biological processes are able to function so fast with a high accuracy.**

Kinetic proofreading | Speed-accuracy trade-off | DNA replication | Translation

**B**iological systems exhibit remarkable accuracy in selecting the right substrate from the pool of chemically similar molecules. This is common to all fundamental biological processes such as DNA replication, RNA transcription and protein translation [1]. The level of fidelity in various stages of genetic information flow depends on their relative importance in sustaining system stability. DNA replication is thought to be the most accurate process with an error rate,  $\eta \sim 10^{-8} - 10^{-10}$  [2, 3] *i.e.*, only 1 out of  $10^8 - 10^{10}$  incorporated nucleotides is mismatched. RNA transcription ( $\eta \sim 10^{-4} - 10^{-5}$ ) and protein translation ( $\eta \sim 10^{-3} - 10^{-4}$ ) processes are also quite accurate but to a somewhat lower degree [4, 5]. Failure to maintain such accuracy adversely affects cell viability and survival. For example, mutations affecting the fidelity in translation increase the amount of unfolded proteins leading to apoptosis [6] and to erroneous replication of genetic material [7].

Initially it was unclear how the small differences in equilibrium binding stability of structurally similar substrates can allow such a high degree of discrimination [8]. Then, an explanation was provided, independently by Hopfield and Ninio [9, 10], who proposed an error-correction mechanism called kinetic proofreading (KPR). KPR allows enzymes to utilize the free energy difference between right and wrong substrates multiple times using additional steps [9]. This amplifies the small energetic discrimination and results in a lower error compared to that in chemical equilibrium. However, such processes require significant energy consumption [9]. To this

end, enzymes employ some energy-rich molecules, like ATP, to provide for the necessary driving [11, 12]. The mechanism was experimentally verified later in different biological systems [13–17]. Several recent studies generalized it to more complex networks and found analogies between proofreading and other phenomena such as microtubule growth [18] or bacterial chemotaxis [19]. These results broaden the concept of KPR and show that such chemically-driven regulatory mechanisms are widely present.

Cells must process genetic information not just accurately but also sufficiently rapidly. Proofreading enhances the accuracy by resetting the system to its initial configuration without progressing to product state [9]. The completion time of the reaction is, thus, expected to increase. Hence, there could be a compromise, or trade-off, between accuracy and speed of the process [20]. The understanding on this trade-off is mainly based on the Michaelis-Menten (MM) description of specificity [21, 22]. These studies indicate that, the minimum-possible error is achieved at vanishingly-low catalytic rate, *i.e.* when the process is the slowest [9, 21]. In contrast, biological polymerization reactions must occur reasonably fast [15, 23]. A recent study demonstrated a new speed-accuracy regime in the KPR model by modifying the catalytic rate [18]. In this regime, a large gain in speed comes with a relatively small loss in accuracy. The authors suggested that biological systems may employ this regime [18]. For example, in tRNA selection process, fast GTP hydrolysis step speeds up protein synthesis but prevents maximal possible selectivity of the initial tRNA-ribosome binding step [21, 24].

Despite the number of studies, a clear quantitative picture

## Significance Statement

Biological processes are unique by showing a remarkable level of accuracy in discriminating between similar molecules. This is attributed to an error-correcting mechanism known as kinetic proofreading. It is widely believed that the enhancement of the accuracy in biological processes always slows down them. Our theoretical study reveals that such trade-offs might not always happen. By analyzing the fundamental processes of DNA replication and protein translation, we established that these systems maximize speed rather than accuracy with additional energetic constraints. Our findings provide a microscopic picture of how complex biological processes can be accomplished so quickly with minimal errors.

KB, ABK, OAI designed research; KB performed research; KB, ABK, OAI wrote the paper

<sup>1</sup>OAI and ABK contributed equally to this work

<sup>2</sup>To whom correspondence should be addressed. E-mails: [igoshin@rice.edu](mailto:igoshin@rice.edu) (OAI) and [tolya@rice.edu](mailto:tolya@rice.edu) (ABK)

125 of how the balance between speed and accuracy is tuned is  
 126 lacking. Several current models of proofreading, still mainly  
 127 focus on the initial stages of substrate selection [22, 25, 26]  
 128 or assume disparity of rate constants of only a few type of  
 129 steps [18, 19]. In contrast, experimental data show that biological systems have different rates for the right and wrong substrates for each step of the network [4, 14, 15]. Therefore, by distributing the discrimination of the reaction rates over the whole network, biological systems might be able to achieve better balance between speed and accuracy. As a consequence, regimes with no trade-off may also arise. Moreover, proofreading steps come with an extra energy cost to gain higher accuracy [11] but the role of this cost in the trade-off is not apparent. Therefore, to understand the fundamental mechanisms of proofreading in real biological systems, one needs to answer the following questions: (i) How does the system set its priorities when choosing between accuracy and speed, two seemingly opposite objectives? (ii) Can speed and accuracy change in the same direction or, in other words, is there always a trade-off? (iii) How does the extra energy expenditure due to KPR affect the speed-accuracy optimization?

146 Here we focus on the role of reaction kinetics in governing the speed-accuracy trade-off. To this end, we develop a generalized framework to study one-loop KPR networks, assuming distinct rate constants for every step of the right (R) and wrong (W) pathways. Based on this approach, we model the overall selection of correct substrate over the incorrect one as a first-passage problem to obtain a full dynamic description of the process [27, 28]. This general framework is applied to two important examples, namely, DNA replication by T7 DNA polymerase (DNAP) [3, 14] and protein synthesis by *E. coli* ribosome [22, 29] (Fig. 1(A,B)). Starting from the experimentally measured rate constants for each system we vary their values to analyze the resulting changes in speed and accuracy and to assess the trade-off. The role played by the extra energy consumption or cost of proofreading [11] is also investigated. By comparing the behavior of the two systems, we search for general properties of biological error correction.

## 164 Methods

166 **Proofreading networks of replication and translation.** DNA replication as well as protein synthesis employ nucleotide complementarity to select the cognate substrate over others. During replication, dNTP molecules complementary to the DNA template are chosen. Similarly, during protein synthesis, aminoacyl(aa)-tRNAs are picked by ribosome based on the complementarity of their anti-codon to the mRNA codon. Wrong substrates that bind initially can be removed by error-correction proofreading mechanisms. Kinetic experiments coupled with modeling revealed a lot of mechanistic details about both the processes [3, 14, 15, 24]. The schemes depicted in Fig. 1 represent the key steps to understand the KPR in these networks.

179 The schemes in Fig. 1(A,C) are for DNA replication [3, 14]. E denotes the T7 DNAP enzyme in complex with a DNA primer-template. The right and wrong substrates are correct and incorrect base-paired dNTP molecules, respectively. Step-1 generates enzyme-DNA complexes ER( or EW) with the primer elongated by one nucleotide. Addition of another correct nucleotide to ER (EW) gives rise to P<sub>R</sub> (P<sub>W</sub>). ER\* and EW\* complexes denote the primer shifted to the exonuclease

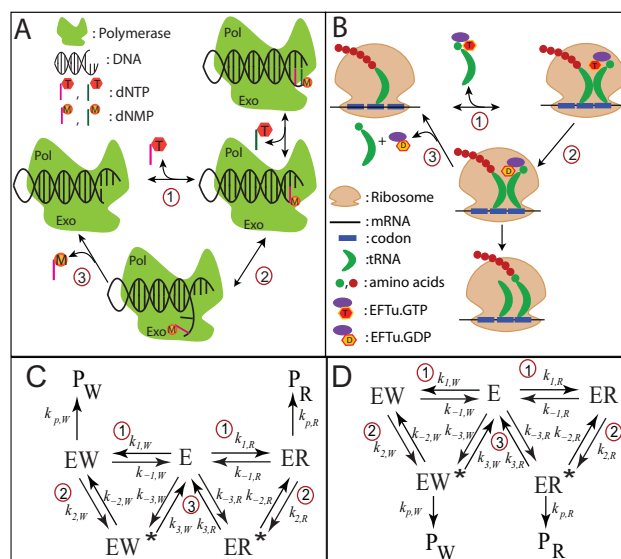

207 **Fig. 1.** Schematic representation of proofreading networks for (A) DNA replication by  
 208 T7 DNA polymerase (DNAP) enzyme and (B) aminoacyl(aa)-tRNA selection by *E.*  
 209 *coli* ribosome during translation. Corresponding chemical networks are shown for  
 210 (C) replication and (D) translation. Reaction steps comprising the cycles are labeled  
 211 1-3. Rate constants of each step are denoted by  $k_{\pm i, R/W}$ ,  $i = 1, 2, 3$ ; subscript  
 212 R or W indicates right (R) or wrong (W) pathways. The rate constants of the steps  
 213 leading to product (end) states are labeled as  $k_{P, R/W}$ . The translation network in  
 214 (D) is related to the replication network in (C) by the following transformation of rate  
 215 constant indices:  $\pm 1 \leftrightarrow \mp 3$ ,  $\pm 2 \leftrightarrow \mp 2$ . The steps involved in each case are,  
 216 of course, different. For details, see text.

217 site (Exo) from the polymerase site (Pol) of DNAP. This  
 218 commences proofreading in step-2. Excision of the nucleotide  
 219 in step-3 resets the system to its initial state.

220 The schemes in Fig. 1(B,D) show the aa-tRNA selection  
 221 process by ribosome during translation [29]. Here, E denotes  
 222 the *E. coli* ribosome with mRNA. Cognate (near-cognate) aa-  
 223 tRNAs in ternary complex with elongation factor Tu (EFTu)  
 224 and GTP bind with ribosome in step-1 to form ER (EW).  
 225 GTP hydrolysis in step-2 results in the complex ER\* (EW\*).  
 226 The latter can take one of two routes. It can progress to the  
 227 product P<sub>R</sub> (P<sub>W</sub>) with the elongation of the peptide chain  
 228 by one amino acid. Alternatively, it can dissociate in the  
 229 proofreading step (step-3), rejecting the aa-tRNA.

230 In both schemes, we take the rate constants of the W cycle  
 231 to be related to those of the R cycle through  $k_{\pm i, W} =$   
 232  $f_{\pm i} k_{\pm i, R}$ ,  $i = 1, 2, 3$  and similarly, for the catalytic step,  
 233  $k_{p, W} = f_p k_{p, R}$ . The set of rate constants  $k_{1, R/W}$ ,  $k_{-3, R/W}$  are  
 234 effectively first-order containing the substrate concentrations.  
 235 The factors  $f_i$  provide the energetic discrimination between  
 236 the R and W pathways. Completion of one cycle (returning to  
 237 the starting state E) effectively amounts to hydrolysis of one  
 238 dNTP molecule for DNA replication and one GTP molecule  
 239 for aa-tRNA selection. The chemical potential difference,  $\Delta\mu$   
 240 (in units of  $k_B T$ ) is equal for both the cycles [19]

$$241 \Delta\mu = \ln\left(\prod_{i=1}^3 \frac{k_{i, R}}{k_{-i, R}}\right) = \ln\left(\prod_{i=1}^3 \frac{k_{i, W}}{k_{-i, W}}\right). \quad [1]$$

242 This leads to the condition

$$243 \prod_{i=1,2,3} \frac{f_i}{f_{-i}} = 1. \quad [2]$$

249 **Accuracy and speed from first-passage description.** We deter-  
 250 mine the error and speed of the substrate selection kinetics  
 251 from the first-passage probability density [27, 28]. With this  
 252 method we can analyze an arbitrary catalytic reaction scheme  
 253 and focus on the transitions starting from the initial state  $E$   
 254 that lead to the final state  $P_R$ . The description allows us to  
 255 get analytical expression for both speed and accuracy for an  
 256 arbitrary set of kinetic parameters. Therefore, we allow differ-  
 257 ent rates for the right and wrong substrates for each step of  
 258 the network as experimentally observed. Furthermore, we do  
 259 not assume any step to be completely irreversible. Otherwise,  
 260 the chemical potential difference over the cycle would diverge  
 261 (see Eq.(1)). This difference is linked to the hydrolysis of some  
 262 energy-rich molecules supplying large but finite free energy.

263 Let us denote  $F_{R,E}(t)$  as the probability density to reach  
 264 state  $P_R$  at time  $t$  for the first time before reaching state  $P_W$   
 265 if the system is in state  $E$  at time  $t = 0$ . The corresponding  
 266 probability density  $F_{W,E}(t)$  is specified in the same manner.  
 267 The evolution equations of  $F_{R/W,E}(t)$  are known as the back-  
 268 ward master equation [27, 30]. It is more convenient to solve  
 269 them in Laplace space (see SI). We define the error,  $\eta$  as the  
 270 ratio of the probabilities to reach the end states  $P_{R/W}$  (also  
 271 called the splitting probability [27]) given by

$$272 \eta = \frac{\Pi_W}{\Pi_R}; \quad \Pi_{R/W} = \int_0^\infty F_{R/W,E}(t) dt. \quad [3]$$

276 It is important to note that this definition is equivalent to the  
 277 traditional[9, 21] one defined as the ratio of the wrong product  
 278 formation rate to the right one (See SI).

279 The speed of a reaction is naturally quantified by the net  
 280 rate of the product formation. As any chemical reaction rate,  
 281 it can be defined as the inverse of the mean first-passage time  
 282 (MFPT), *i.e.*, the mean time it takes to cross the energy barrier  
 283 that separates reactants and products for the first time. For  
 284 example, a well-known application of this approach for single-  
 285 molecule MM kinetics results in the traditional expression for  
 286 the rate as the inverse of the MFPT [31]. We note that the  
 287 speed towards the correct product can nevertheless be affected  
 288 by the presence of the incorrect substrate. Thus it is important  
 289 to consider them together in contrast to the prevalent measure  
 290 of the speed in literature neglecting the presence of the wrong  
 291 pathway [21]. In our case, the expression of the mean first  
 292 passage time to reach each product state is given by the first  
 293 moment of the corresponding probability density [27]

$$294 \tau_{R/W} = \frac{1}{\Pi_{R/W}} \int_0^\infty t F_{R/W,E}(t) dt. \quad [4]$$

298 In what follows, we focus on  $\tau_R$  as the measure of speed and  
 299 denote it simply by  $\tau$ .

## 301 Results

303 While our formalism can be applied to an arbitrary KPR  
 304 scheme, we've chosen to study two fundamentally important  
 305 biological processes — DNA replication and translation.  
 306 These processes are best characterized in terms of underlying  
 307 kinetic parameters and we can study the speed-accuracy trade-  
 308 off in the biologically relevant parameter region. Notably,  
 309 despite differences in parameters and KPR mechanisms for  
 310 the two case studies we reach similar conclusions for both.

311 **Importance of speed over accuracy in DNA replication by T7**  
 312 **DNA polymerase.** The T7 DNAP enzyme catalyzes the poly-  
 313 merization of a DNA primer over a template strand [14].  
 314 Wrongly incorporated dNTP is removed by the proofreading  
 315 mechanism that involves the exonuclease site of DNAP  
 316 [23]. The model parameters of the corresponding reaction  
 317 network (Fig. 1(A)) are listed in Table S1 (see SI). They are  
 318 based on the experimental data of Wong *et al.* [23]. We do  
 319 not consider dissociation of the DNA from the enzyme in our  
 320 model. This is justified due to the faster polymerization rates  
 321 in the R path and higher exonucleolytic sliding rate in the W  
 322 path (see Table S1).

323 The error,  $\eta$  varies among three limits as a function of  
 324 the polymerization rate constant,  $k_{1,R}(=k_{p,R})$  [23] with fixed  
 325  $f_1, f_p$ . All of them are lower bounds obtained in the limit  
 326  $k_{1,R} \rightarrow 0$  ( $\eta_L$ ),  $k_{1,R} \rightarrow \infty$  ( $\eta_H$ ) and an intermediate case  
 327 with  $k_{1,R} \lesssim k_{-1,R}$  ( $\eta_M$ ). Explicit expressions follow from the  
 328 general one for  $\eta$  (see SI). Here, we give suitable ratios of these  
 329 limits to understand the error variation pattern

$$330 \frac{\eta_L}{\eta_M} = \frac{f_2}{f_{-1}}, \quad \frac{\eta_H}{\eta_M} = \frac{f_2}{f_p} \frac{k_{3,R}}{k_{-1,R} K_{M,R}}. \quad [5]$$

334 Here,  $K_{M,R} = \frac{k_{-2,R} + k_{3,R}}{k_{2,R}}$ . From the experimental parameter  
 335 values (see Table S1) and Eq.(5), we expect  $\eta_M < \eta_L, \eta_H$ .  
 336 In other words, the system has a minimum error at some  
 337 intermediate polymerization rate. This is indeed the case as  
 338 shown in Fig. 2A. On the other hand, the MFPT,  $\tau$  decreases,  
 339 and hence the speed increases, monotonously with increase  
 340 in  $k_{1,R}$  (see Fig. 2B). The range of  $\tau$  also spans several  
 341 orders of magnitude. The  $\eta$ - $\tau$  curve is shown in Fig. 2C.  
 342 Negative slope of this curve indicates speed-accuracy trade-  
 343 off, *i.e.*, higher accuracy (lower  $\eta$ ) corresponds to lower speed  
 344 (higher  $\tau$ ) and vice versa. It is evident from Fig. 2C that  
 345 there is a trade-off *only when the polymerization rate constant*  
 346 *becomes greater than the value corresponding to the minimum*  
 347 *error.* We call this branch with negative slope the trade-off  
 348 branch. For lower values of  $k_{1,R}$ , error and MFPT change in  
 349 the same direction. This branch with positive slope of the  
 350  $\eta$ - $\tau$  curve is denoted as the non-trade-off branch. Intuitively,  
 351 the lack of trade-off for low polymerization rates arises due  
 352 to different magnitudes of these rates between the right and  
 353 wrong pathways; the latter has much smaller rates. When the  
 354 polymerization rate is sufficiently smaller than the Pol-Exo  
 355 sliding rate, correct substrate incorporation must undergo  
 356 lots of unnecessary proofreading cycles. These futile cycles  
 357 adversely affect the right pathway more, thereby compromising  
 358 both speed and accuracy. Thus, *the speed-accuracy trade-off*  
 359 *might not be always observed* during the proofreading processes,  
 360 and this is our first important result.

362 The actual system (green circle) is situated on the trade-off  
 363 branch of the  $\eta$ - $\tau$  curve in Fig. 2C. It lies far away from the  
 364 minimum error point (red triangle). In particular, the mini-  
 365 mum error is  $\sim 150$ -fold lower than that of the actual system.  
 366 However, to achieve this minimum error, the system's speed  
 367 would drop by  $\sim 3500$ -fold. Thus, *the polymerization rate*  
 368 *constant is selected to achieve high-enough speed.* Significant  
 369 amount of accuracy is lost in the process. The system can  
 370 further lower the MFPT by moving down the slope of the  
 371  $\eta$ - $\tau$  curve. But, that means giving up more accuracy. So,  
 372 of course, there is also a tolerable upper level of  $\eta$ .



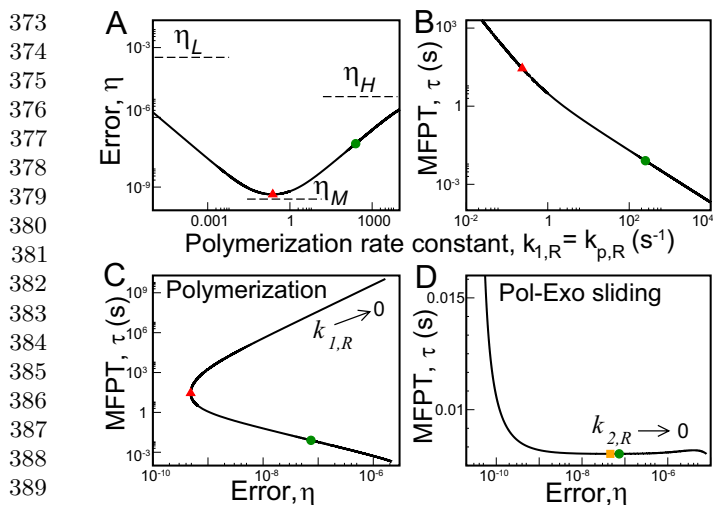

**Fig. 2.** Speed-accuracy trade-off for T7 DNA polymerase. (A) The change in error,  $\eta$  as a function of the polymerization rate constant  $k_{1,R}$  ( $= k_{p,R}$ ). The error is bounded by the predicted limits, Eq.(5). The green circle indicates the position of the actual system that is far away from the minimum error (red triangle). (B) Variation of MFPT,  $\tau$  with  $k_{1,R}$ . The red triangle gives the  $\tau$  value corresponding to the minimum in  $\eta$ . (C)  $\eta$ - $\tau$  curve for the polymerization step. (D)  $\eta$ - $\tau$  curve for the Pol-Exo sliding step involved in proofreading generated by varying  $k_{2,R}$  keeping  $f_2$  fixed (semi-log plot). There is a local minimum in  $\tau$  (yellow square) near the actual value (green dot).

The Pol-Exo sliding is an important step in error correction. The  $\eta$ - $\tau$  curve for this step is plotted in Fig. 2D. The minimum error value is approached in an asymptotic fashion at very large  $k_{2,R}$ . In contrast, the global minimum of MFPT is obtained in the  $k_{2,R} \rightarrow 0$  limit. The MFPT also has a local minimum (yellow square) and a local maximum at finite  $k_{2,R}$ . Interestingly, the actual system lies pretty close to this (local) minimum. In particular, the system's  $\tau$  value is almost identical to the minimum  $\tau$  (within a less than 0.01%). On the other hand, the corresponding error  $\eta$  is  $\sim 1.6$ -fold higher than that corresponding to the minimum MFPT. The speed-accuracy trade-off appears after  $k_{2,R}$  crosses the value corresponding to the local minimum in  $\tau$  (and also before the local maximum). So, the system is positioned on the non-trade-off branch of the  $\eta$ - $\tau$  curve. As one moves in either direction from the minimum  $\tau$  point, error can change greatly with slight alteration in  $\tau$  until  $\eta$  is too low. Therefore, speed appears to be more important as long as the system remains reasonably accurate. However, the system can gain lower errors at similar speeds by moving left to the trade-off branch of the  $\eta$ - $\tau$  curve. Then, what is the reason for not taking that route? We note, that the proofreading pathway resets the system to the starting condition without progressing to product formation. Therefore, speed-up in proofreading rate can increase the associated extra energy cost [11]. This may restrict the system to go to the more advantageous regime that has greater KPR rate and so, somewhat larger cost. We will further elaborate on this point in our next case study.

**tRNA selection by *E. coli* ribosome is optimized for speed rather than accuracy with a cost constraint.** During translation, the ribosome decodes the mRNA sequences by selecting aa-tRNAs in ternary complex with elongation factor Tu (EF-Tu) and GTP [4, 15]. Non-cognate aa-tRNAs are removed by proofreading dissociation of the complex from the ribosome

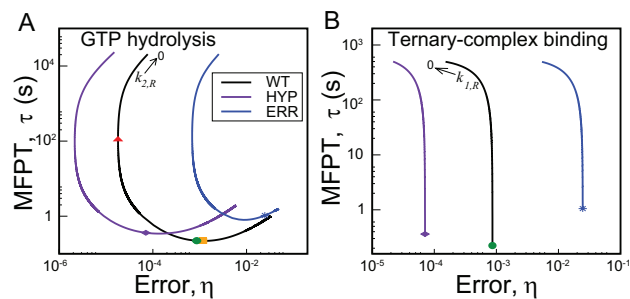

**Fig. 3.** Speed-accuracy trade-off in aa-tRNA selection by three varieties of *E. coli* ribosome. One is the wild-type (WT). The other two are hyper-accurate (HYP) and more error-prone (ERR) mutants. (A)  $\eta$ - $\tau$  curves for the GTP hydrolysis step. The actual system (green circle, WT) is situated close to the minimum  $\tau$  (yellow square) and far away from minimum  $\eta$  (red triangle). This is also true for the mutants. (B) Speed-accuracy trade-off for the ternary complex binding step. The minimum error is achieved in the  $k_{1,R} \rightarrow 0$  limit. MFPTs for all the systems are close to saturation.

A-site after GTP hydrolysis [24, 29]. The model parameters of the network (Fig. 1B) for WT *E. coli* ribosome are listed in Table S2 (see SI). They are based on the experimental data of Zaher *et al.* [29]. We chose  $k_{-2,R} = k_{-3,R} = 10^{-3} \text{ s}^{-1}$  to ensure that both step-2 and step-3 are nearly irreversible [29]. There remains one free parameter  $f_{-2}$  (as  $f_{-3}$  gets fixed from Eq.(2)). We assumed  $f_{-2} = 1$  but our main conclusions are independent of this choice (see SI, Fig. S1).

We show the  $\eta$ - $\tau$  curves for GTP hydrolysis and ternary complex binding steps in Fig. 3A and 3B, respectively, for three varieties of *E. coli* ribosome. One is the wild-type (WT) and the other two are mutants. One mutant, *rpsL141*, is hyper-accurate (HYP) and the other mutant, *rpsD12*, is more error-prone (ERR) than WT [29]. Variation of the hydrolysis rate constant,  $k_{2,R}$  (keeping  $f_2$  fixed) results in quite large changes in error and MFPT. The trends are similar for all the three systems (see Tables S3, S4 in SI for parameter sets of mutants). As for the polymerization steps in DNA replication, error varies among three bounds for the GTP hydrolysis step. They are obtained from the general expression of  $\eta$  (see SI) for low, intermediate and high values of  $k_{2,R}$

$$\eta_L = \alpha \frac{f_{-3}}{f_3}, \quad \eta_M = \alpha \frac{f_1 f_2}{f_{-1} f_3}, \quad \eta_H = \alpha \frac{f_1}{f_3} \quad [6]$$

where  $\alpha = k_{p,W}/k_{3,R}$ . For the parameter set of the system (see Table S2,  $f_{-2} = 1$ ), one gets  $\eta_M < \eta_L, \eta_H$ . Thus, the error vs hydrolysis rate curve passes through a minimum. Interestingly, there is also a minimum in  $\tau$  as shown in Fig. 3A. The two minima are at different  $k_{2,R}$  values though. The speed-accuracy trade-off occurs between the minimum  $\eta$  (red triangle, WT) and the minimum  $\tau$  (yellow square, WT) points. As is evident from Fig. 3A, all the systems are positioned close to the minimum  $\tau$  and far away from minimum  $\eta$ . For example, the WT ribosome would become  $\sim 500$ -fold slower to achieve the minimum error although the latter is  $\sim 50$ -fold lower than the actual value. Hence, speed is preferred to accuracy. We tested the generality of this claim against multiple parameter variations (see SI, Fig. S2) and it appears that speed is indeed more important. The robustness of this result is also tested successfully against fluctuations of the rate constants (see Fig. S3). Interestingly, the WT ribosome is faster and hence, better optimized for speed than both the mutants. It is important to note that the more accurate mutant HYP was not chosen

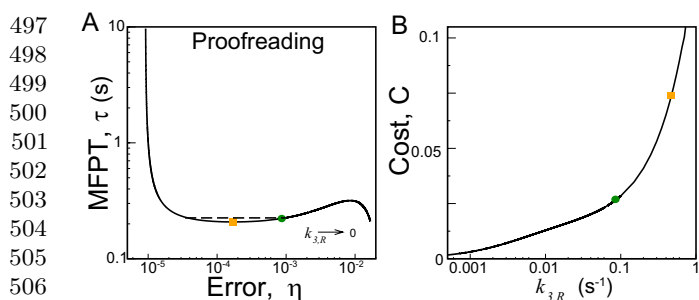

**Fig. 4.** (A)  $\eta$ - $\tau$  diagram for the proofreading step. The actual system (green dot, WT) has a  $\tau$  value similar to the local minimum in  $\tau$  (yellow square). The dashed line shows the range up to which the system can lower the error with no loss in speed. (B) The proofreading cost,  $C$  as a function of  $k_{3,R}$ . Its value at the local minimum in  $\tau$  (yellow square) is  $\sim 3$ -fold higher than that of the actual system (green dot).

by the nature. This point further emphasizes the importance of speed over accuracy in translation.

The change in the ternary complex binding rate constant,  $k_{1,R}$  (with  $f_1$  fixed) also affects both the error and the MFPT significantly but on a smaller scale than hydrolysis (see Fig. 3B). There is always a trade-off between speed and accuracy unlike the cases studied so far. The minimum in error is obtained in the  $k_{1,R} \rightarrow 0$  limit whereas the maximum speed is achieved for very large  $k_{1,R}$ . With increase in  $k_{1,R}$ ,  $\tau$  falls several orders in magnitude. Interestingly, all the systems have  $\tau$  values almost identical to their respective saturation limits. To attain that, they sacrifice an order of magnitude in terms of accuracy. Therefore, regarding speed-accuracy trade-off, the system is inclined to be faster with higher but tolerable error.

Next, we explore the effects of variation of the proofreading step rate constant,  $k_{3,R}$  (keeping  $f_3$  fixed) on system performance. The resulting  $\eta$ - $\tau$  diagram is plotted in Fig. 4A for the WT ribosome. The global minimum of  $\tau$  is obtained in the  $k_{3,R} \rightarrow 0$  limit whereas, the minimum of  $\eta$  lies in the large  $k_{3,R}$  limit. There is a local minimum (yellow square) of  $\tau$  at some intermediate  $k_{3,R}$  along with a local maximum. Mutant ribosomes have similar trends (not shown in figure). The nature of the  $\eta$ - $\tau$  curve is qualitatively similar to that obtained for the proofreading Pol-Exo sliding step in DNA replication (see Fig. 2D) with two speed-accuracy trade-off branches. The actual system (green circle) is located on the non-trade-off branch that links the two trade-off branches of the  $\eta$ - $\tau$  curve. It has a MFPT close to ( $\sim 1.1$ -fold higher) the (local) minimum  $\tau$  value. However, the minimum  $\tau$  point also has a  $\sim 5$ -fold lower  $\eta$ . More important is the fact that, the system can attain much lower errors with similar, even slightly higher, speeds if it moves left up to a certain level (the dashed line in Fig. 4A). So, what prevents the system to gain both in speed and accuracy?

Since correction by proofreading resets the system without a product formation it has a cost associated with futile cycles where the correct substrate was inserted and then removed. The cost of proofreading,  $C$  is defined as the ratio of the resetting flux to the product formation flux including both R and W pathways [11] (see SI). This gives a measure of the amount of extra energy-rich molecules consumed due to the presence of the proofreading step. Specifically, the cost  $C$  can quantify the moles of dNTP(or GTP) used for proofreading per mole of product [11]. This quantity can be easily com-

puted from our formalism and investigated as a function of kinetic parameters. In particular, we quantify how the cost of proofreading changes with the increase in  $k_{3,R}$  near local minimum of the  $\eta$ - $\tau$  curve in Fig. 4A. The results, shown in Fig. 4B, demonstrate that the cost associated with the (local) minimum  $\tau$  point is  $\sim 3$ -fold higher than that of the actual system. This cost-disadvantage (3-fold higher GTP consumption per amino acid!) may restrict the system from gaining the available advantage in both speed and accuracy. Similar consideration may also be responsible for the nature of trade-off exhibited in the DNA replication case (Fig. 2D).

## Discussion

Evolution has optimized the kinetic parameters of biological enzymes to achieve the desired levels of accuracy and speed at various stages of biological information flow. In this study, by examining how the balance between speed and accuracy changes with variation of the underlying kinetic parameters, we gain new insights of the important priorities for this optimization. To this end, we focus on two fundamental examples of biological proofreading networks: DNA replication and protein translation. In both the cases, the systems tend to achieve maximum speed by losing significant accuracy. However, the speed-accuracy trade-off only occurs in the limited region of the parameter space, e.g., after the polymerization rate in replication passes the minimum error point. In case of translation, the trade-off appears between the minima in error and the MFPT for the GTP hydrolysis step. Similar conclusion about the importance of speed over accuracy is reached by varying the rates of the proofreading steps in both systems. Although higher proofreading rates can further improve the accuracy without losing much in speed, the associated energy cost of proofreading may restrict further improvements on an already acceptable speed and accuracy.

An important new insight from the above analyses is that, speed-accuracy trade-off is not universally present and its occurrence depends on the specific values of kinetic rates. Biologically that implies that mutations or application of drugs that reduce the enzyme's accuracy do not necessarily increase its speed and *vice versa*. The widespread view of a compromise between accuracy and speed is mainly based on their dependence on the effective catalytic rate of the process [9, 21]. Indeed, the larger catalytic rate – the higher speed and the lower accuracy. However, the role of other steps, like hydrolysis and proofreading, are not as straightforward. Our study reveals that, for these steps, trade-offs are present only over a certain range of rates. The partitioning of the error-time curves into trade-off and non-trade-off branches clarifies the distinct roles of various transitions and the molecular mechanisms of the speed-accuracy optimization. Our conclusions are also supported by a more advanced analysis of the maximum speed vs accuracy curves using Pareto fronts, as explained in detail in the SI.

The analysis of speed-accuracy trade-off for different mutant varieties of *E. coli* ribosome further confirms the importance of speed over accuracy. The WT and two mutants (HYP and ERR) lie close to the minimum MFPT point on the error-time curves (Fig.3A). However, the WT and HYP ribosomes are on the trade-off branch whereas, the ERR mutant is on the non-trade-off branch. Thus, movement down the slope towards the trade-off branch would raise both accuracy and speed for

621 the ERR ribosome. That is how the WT ribosome may have  
622 evolved from the more erroneous ERR type. However, any  
623 further movement upwards along the trade-off branch means  
624 slowdown with a lower error. This leads to the more accurate  
625 (HYP) mutant. Rejection of the latter as the natural choice  
626 implies that optimization of speed is critical. We note that  
627 comparison of *E. coli* growth rates with WT and mutant ribo-  
628 somes already indicates such an optimization [21, 32]. However,  
629 according to the prevailing notion on the ever-present com-  
630 promise between error and speed, the more erroneous (ERR)  
631 ribosome should be faster. Hence, the hindered growth for  
632 ERR mutant was ascribed presumably to less-active proteins  
633 [33]. Our results indicate that, not only the accuracy but also  
634 the speed of peptide-chain elongation can be smaller for the  
635 ERR mutant.

636 Despite different schemes and parameter values of the repli-  
637 cation and translation networks, there appears to be a general  
638 mechanism of error correction. This becomes apparent from  
639 the trade-off diagrams for the proofreading step. Rate con-  
640 stant of the proofreading step in both the cases is selected such  
641 that speed of the system is close to the maximum-possible  
642 one. The actual systems reside on the non-trade-off branch  
643 of their respective error-time curves. Biologically that implies  
644 that mutation that slightly speeds-up the proofreading step  
645 would lead to increase in both speed and accuracy of the  
646 enzymes. However, we show that such mutation would also  
647 increase energetic costs of proofreading. This extra cost does  
648 not allow the systems to further reduce the error and MFPT.  
649 Furthermore, the most interesting feature for both the systems  
650 is the proximity of the MFPT value to the local minimum  
651 which is similar in magnitude to the global minimum. Hence,  
652 for both case studies the KPR rate is fine-tuned so that the  
653 loss in speed is insignificant compared to the improvement in  
654 accuracy.

655 Our results on the accuracy-speed trade-off in two impor-

656  
657  
658  
659  
660  
661  
662  
663  
664  
665  
666  
667  
668  
669  
670  
671  
672  
673  
674  
675  
676  
677  
678  
679  
680  
681  
682

1. Alberts B et al. (2013) *Essential cell biology*. (Garland Science), 4th edition.
2. Watson JD (1976) *Molecular biology of the gene*. (California: WA Benjamin).
3. Kunkel TA, Bebenek K (2000) DNA Replication Fidelity. *Annu Rev Biochem* 69:497–529.
4. Zaher HS, Green R (2009) Fidelity at the Molecular Level: Lessons from Protein Synthesis. *Cell* 136:746–762.
5. Reynolds NM, Lazizzera BA, Ibba M (2010) Cellular mechanisms that control mistranslation. *Nat Rev Microbiol* 8:849–856.
6. Nangle LA, de Crecy Lagard V, Doring V, Schimmel P (2002) Genetic code ambiguity cell viability related to severity of editing defects in mutant tRNA synthetases. *J Biol Chem* 277:45729–45733.
7. Schimmel P (2008) Development of tRNA synthetases and connection to genetic code and disease. *Protein Sci* 17:1643–1652.
8. Pauling L (1957) *The probability of errors in the process of synthesis of protein molecules*. *Festschrift Arthur Stoll*. (Birkhauser Verlag, Basel), pp. 597–602.
9. Hopfield JJ (1974) Kinetic Proofreading: A New Mechanism for Reducing Errors in Biosynthetic Processes Requiring High Specificity. *Proc Natl Acad Sci USA* 71:4135–4139.
10. Ninio J (1975) Kinetic amplification of enzyme discrimination. *Biochimie* 57:587–595.
11. Freter RR, Savageau Ma (1980) Proofreading systems of multiple stages for improved accuracy of biological discrimination. *J Theor Biol* 85:99–123.
12. Ehrenberg M, Blomberg C (1980) Thermodynamic Constraints on Kinetic Proofreading in Biosynthetic Pathways. *Biophys J* 31:333–358.
13. Hopfield JJ, Yamane T, Yue V, Coutts SM (1976) Direct experimental evidence for kinetic proofreading in amino acylation of tRNA. *Proc Natl Acad Sci USA* 73:1164–1168.
14. Johnson KA (1993) Conformational coupling in DNA polymerase fidelity. *Annu Rev Biochem* 62:685–713.
15. Gromadski KB, Rodnina MV (2004) Kinetic Determinants of High-Fidelity tRNA Discrimination on the Ribosome. *Mol Cell* 13:191–200.
16. Blanchard SC, Gonzalez RL, Kim HD, Chu S, Puglisi JD (2004) tRNA selection and kinetic proofreading in translation. *Nat Struct Mol Biol* 11:1008–1014.
17. Kunkel TA (2004) DNA Replication Fidelity. *J Biol Chem* 279:16895–16898.
18. Murugan A, Huse DA, Leibler S (2012) Speed, dissipation, and error in kinetic proofreading. *Proc Natl Acad Sci USA* 109:12034–12039.
19. Hartich D, Barato AC, Seifert U (2015) Nonequilibrium sensing and its analogy to kinetic proofreading. *New J Phys* 17:055026.
20. Thompson RC, Karim AM (1982) The accuracy of protein biosynthesis is limited by its speed: high fidelity selection by ribosomes of aminoacyl-tRNA ternary complexes containing GTP [gamma S]. *Proc Natl Acad Sci USA* 79:4922–4926.
21. Johansson M, Lovmar M, Ehrenberg M (2008) Rate and accuracy of bacterial protein synthesis revisited. *Curr Opin Microbiol* 11:141–147.
22. Johansson M, Zhang J, Ehrenberg M (2012) Genetic code translation displays a linear trade-off between efficiency and accuracy of tRNA selection. *Proc Natl Acad Sci USA* 109:131–136.
23. Wong I, Patel SS, Johnson KA (1991) An induced-fit kinetic mechanism for DNA replication fidelity: direct measurement by single-turnover kinetics. *Biochemistry* 30:526–537.
24. Wohlgemuth I, Pohl C, Mittelstaet J, Konevega AL, Rodnina MV (2011) Evolutionary optimization of speed and accuracy of decoding on the ribosome. *Phil Trans R Soc B* 366:2979–2986.
25. Sartori P, Pigolotti S (2013) Kinetic versus energetic discrimination in biological copying. *Phys Rev Lett* 110:188101.
26. Savir Y, Tlusty T (2013) The ribosome as an optimal decoder: A lesson in molecular recognition. *Cell* 153:471–479.
27. van Kampen NG (2007) *Stochastic processes in physics and chemistry*. (North Holland Publishing Company, Amsterdam), 3rd edition.
28. Bei G, Munsch B, Nemenman I (2010) The simplicity of completion time distributions for common complex biochemical processes. *Physical Biology* 7(1):016003.
29. Zaher HS, Green R (2010) Hyperaccurate and Error-Prone Ribosomes Exploit Distinct Mechanisms during tRNA Selection. *Molecular Cell* 39(1):110–120.
30. Kolomeisky AB (2015) *Motor Proteins and Molecular Motors*. (CRC Press, Taylor and Francis Group).
31. Kou SC, Cherayil BJ, Min W, English BP, Xie XS (2005) Single-molecule Michaelis - Menten equations. *Journal of Physical Chemistry B* 109(41):19068–19081.
32. Tubulekas I, Hughes D (1993) Suppression of rpsL phenotypes by tuf mutations reveals a unique relationship between translation elongation and growth rate. *Mol Microbiol* 7:275–284.
33. Lovmar M, Ehrenberg M (2006) Rate, accuracy and cost of ribosomes in bacterial cells. *Biochimie* 88:951–961.
34. Murugan A, Huse DA, Leibler S (2014) Discriminatory proofreading regimes in nonequilibrium systems. *Physical Review X* 4(2):021016.



# Supporting Information

Banerjee et al. 10.1073/pnas.XXXXXXXXXX

## SI Text

**First-passage probability density: Evolution equations.** We study the kinetics of the proofreading networks in terms of the first-passage process. The key quantity to characterize the dynamic properties of the system is the first-passage probability density. Let us denote  $F_{R,i}(t)$  as the first-passage probability density to reach the right (R) end-state at time  $t$  forming product  $P_R$  for the first time before reaching the wrong (W) end-state (product  $P_W$ ), starting from state  $i$  at time  $t = 0$  (see Fig. 1). The corresponding probability density  $F_{W,i}(t)$  is defined in the same manner. The equations describing the time-evolution of the first-passage probability densities are generally known as the backward master equations. To solve them, we introduce  $\mathbf{F}_R = (F_{R,E}, F_{R,ER}, F_{R,ER^*}, F_{R,EW}, F_{R,EW^*})^T$ .  $\mathbf{F}_W$  is constructed in similar fashion.

For the DNA replication network (Fig. 1C), we can write

$$\frac{d}{dt}\mathbf{F}_{R/W} = \mathbf{M}\mathbf{F}_{R/W} + \mathbf{N}_{R/W}. \quad [1]$$

Here,  $\mathbf{N}_R = (0, k_{p,R}\delta(t), 0, 0, 0)^T$  and  $\mathbf{N}_W = (0, 0, 0, k_{p,W}\delta(t), 0)^T$ ,  $\delta(t)$  being the Dirac-delta function. The transition matrix

$$\mathbf{M} = \begin{pmatrix} -D_1 & k_{1,R} & k_{-3,R} & k_{1,W} & k_{-3,W} \\ k_{-1,R} & -D_2 & k_{2,R} & 0 & 0 \\ k_{3,R} & k_{-2,R} & -D_3 & 0 & 0 \\ k_{-1,W} & 0 & 0 & -D_4 & k_{2,W} \\ k_{3,W} & 0 & 0 & k_{-2,W} & -D_5 \end{pmatrix} \quad [2]$$

where  $D_1 = (k_{1,R} + k_{1,W} + k_{-3,R} + k_{-3,W})$ ,  $D_2 = (k_{-1,R} + k_{2,R} + k_{p,R})$ ,  $D_3 = (k_{-2,R} + k_{3,R})$ ,  $D_4 = (k_{-1,W} + k_{2,W} + k_{p,W})$ ,  $D_5 = (k_{-2,W} + k_{3,W})$ .

It is more convenient to solve Eq.(1) in Laplace space. The Laplace transform of  $F_{R/W,i}(t)$  is defined as

$$\tilde{F}_{R/W,i}(s) = \int_0^\infty e^{-st} F_{R/W,i}(t) dt. \quad [3]$$

Under this transformation, with the initial condition  $F_{R/W,i}(t = 0) = 0$ , ( $i \neq R/W$ ), Eq.(1) becomes

$$s\tilde{\mathbf{F}}_{R/W} = \mathbf{M}\tilde{\mathbf{F}}_{R/W} + \tilde{\mathbf{N}}_{R/W}. \quad [4]$$

Here,  $\tilde{\mathbf{F}}_R = (\tilde{F}_{R,E}, \tilde{F}_{R,ER}, \tilde{F}_{R,ER^*}, \tilde{F}_{R,EW}, \tilde{F}_{R,EW^*})^T$  ( $\tilde{\mathbf{F}}_W$  is similarly defined).  $\tilde{\mathbf{N}}_R = (0, k_{p,R}, 0, 0, 0)^T$  and  $\tilde{\mathbf{N}}_W = (0, 0, 0, k_{p,W}, 0)^T$ . From the algebraic set of equations, Eq.(4), one gets the desired quantities  $\tilde{F}_{R,E}(s)$  and  $\tilde{F}_{W,E}(s)$ , *i.e.*, the first-passage probability density to reach one of the two end-states for the first time before reaching the other, starting from state-E. The corresponding splitting probabilities to reach either of the end-states are expressed as

$$\Pi_{R/W} = \tilde{F}_{R/W,E}(s)|_{s=0}. \quad [5]$$

We employ the same methodology for the translation network in Fig. 1D. Note that now the end-states are linked with the states  $ES^*$  instead of  $ES$  as in replication. The transition matrix  $\mathbf{M}$  has similar structure but now with  $D_2 = (k_{-1,R} + k_{2,R})$ ,  $D_3 = (k_{-2,R} + k_{3,R} + k_{p,R})$ ,  $D_4 = (k_{-1,W} + k_{2,W})$ ,  $D_5 = (k_{-2,W} + k_{3,W} + k_{p,W})$ . We also get  $\mathbf{N}_R = (0, 0, k_{p,R}\delta(t), 0, 0)^T$  and  $\mathbf{N}_W = (0, 0, 0, 0, k_{p,W}\delta(t))^T$ . The corresponding Laplace transforms are  $\tilde{\mathbf{N}}_R = (0, 0, k_{p,R}, 0, 0)^T$  and  $\tilde{\mathbf{N}}_W = (0, 0, 0, 0, k_{p,W})^T$ .

**Error in replication and translation.** The error is defined as the ratio of the splitting probabilities

$$\eta = \Pi_W/\Pi_R. \quad [6]$$

The exact expression of error for the DNA replication network (Fig. 1C in main text) is given by

$$\eta = f_p \frac{\left( (k_{p,R} + k_{-1,R})(k_{-2,R} + k_{3,R}) + k_{2,R}k_{3,R} \right) \left( k_{1,W}k_{3,W} + k_{-2,W}(k_{1,W} + k_{-3,W}) \right)}{\left( (k_{p,W} + k_{-1,W})(k_{-2,W} + k_{3,W}) + k_{2,W}k_{3,W} \right) \left( k_{1,R}k_{3,R} + k_{-2,R}(k_{1,R} + k_{-3,R}) \right)} \quad [7]$$

The experimental data suggest the following limits:  $k_{-1,S} \ll k_{p,S}$ ,  $k_{-3,S} \ll k_{1,S}$  ( $S = R$  or  $W$ ). Under these limits, one gets

$$\eta \approx \eta_{app} = f_p f_1 \left( \frac{k_{p,R} + k_{3,R}/K_{M,R}}{k_{p,W} + k_{3,W}/K_{M,W}} \right), \quad K_{M,S} = \frac{k_{-2,S} + k_{3,S}}{k_{2,S}}. \quad [8]$$

It is easy to see that the translation network (Fig. 1D in main text) is related to the replication network by the following transformation of rate constant indices:  $\pm 1 \longleftrightarrow \mp 3$ ,  $\pm 2 \longleftrightarrow \mp 2$ . Then, from Eq.(7), the general expression of error for the translation network comes out as

$$\eta = f_p \frac{\left( (k_{p,R} + k_{3,R})(k_{-1,R} + k_{2,R}) + k_{-1,R}k_{-2,R} \right) \left( k_{2,W}(k_{1,W} + k_{-3,W}) + k_{-1,W}k_{-3,W} \right)}{\left( (k_{p,W} + k_{3,W})(k_{-1,W} + k_{2,W}) + k_{-1,W}k_{-2,W} \right) \left( k_{2,R}(k_{1,R} + k_{-3,R}) + k_{-1,R}k_{-3,R} \right)} \quad [9]$$

If one considers no discrimination in step 2 and the catalysis step, *i.e.*, sets  $f_2 = 1 = f_{-2} = f_p$ , then Eq.(9) reduces to the form as originally derived by Hopfield [Hopfield JJ (1974) Proc Natl Acad Sci USA 71:4135–4139, Eq.(5)]. This clearly shows the validity of our approach. According to experimental data, GTP hydrolysis (step-2) and proofreading (step-3) steps are mainly unidirectional. Then, taking the limits  $k_{-2,S}, k_{-3,S} \rightarrow 0$ , we get the approximate form of error as

$$\eta_{\text{app}} = \frac{f_1 f_2 f_p (k_{3,R} + k_{p,R})(k_{-1,R} + k_{2,R})}{(k_{3,W} + k_{p,W})(k_{-1,W} + k_{2,W})}. \quad [10]$$

**Dependence of minimum error on the ratio of proofreading rate to catalysis rate.** The minimum in error is obtained when the system is away from equilibrium but the initial enzyme-substrate binding equilibrium is minimally disturbed. This means  $k_{2,S} \ll k_{-1,S}$  ( $S = R$  or  $W$ ) with the magnitude of  $k_{2,S}$  being high-enough to provide sufficient driving chemical potential difference over the cycles. From Eq.(10), we get the minimum error as

$$\eta_{\text{min}} = \frac{f_1 f_2 f_p}{f_{-1}} \frac{(k_{3,R} + k_{p,R})}{(k_{3,W} + k_{p,W})}. \quad [11]$$

We now consider three different scenarios of  $k_{3,S}/k_{p,S}$ .

Case I.  $\frac{k_{3,S}}{k_{p,S}} \gg 1$ , *i.e.*, the catalysis rates for both right and wrong pathways are small compared to proofreading. From Eq.(11), one gets

$$\eta_{\text{min,I}} = \frac{f_1 f_2 f_p}{f_{-1} f_3}. \quad [12]$$

It is satisfactory to see that, if one sets  $f_1 = 1 = f_2 = f_p$  and  $f_{-1} = f_0 = f_3$ , then one achieves the Hopfield limit of minimum error  $\frac{1}{f_0^2}$ .

Case II.  $k_{3,R} \ll k_{p,R}$ ,  $k_{3,W} \gg k_{p,W}$ , *i.e.*, the catalysis rate of right pathway dominates proofreading but the opposite is true for the wrong pathway. The WT ribosome as well as the mutants are examples of such cases (see Tables S3-S5). In this case, we have

$$\eta_{\text{min,II}} = \frac{f_1 f_2 f_p}{f_{-1} f_3} \left( \frac{k_{p,R}}{k_{3,R}} \right). \quad [13]$$

Case III.  $\frac{k_{3,S}}{k_{p,S}} \ll 1$ , *i.e.*, the catalysis rates for both right and wrong pathways are large compared to proofreading. Then, from Eq.(11) it follows

$$\eta_{\text{min,III}} = \frac{f_1 f_2}{f_{-1}}. \quad [14]$$

Comparing Eqs.(12)-(14), we have

$$\eta_{\text{min,I}} < \eta_{\text{min,II}} < \eta_{\text{min,III}}. \quad [15]$$

For the sake of completeness, we also determine the minimum error in the DNA replication case. From Eq.(8), large  $k_{2,S}$  gives this limit as

$$\eta_{\text{min}} = \frac{f_1 f_p}{f_2 f_3} \frac{(k_{-2,W} + k_{3,W})}{(k_{-2,R} + k_{3,R})}. \quad [16]$$

We take  $k_{-2,R} = k_{-2,W}$ ,  $k_{3,R} = k_{3,W}$  (see Table S2) and then  $\eta_{\text{min}} = \frac{f_1 f_p}{f_2}$ . A high excision (by hydrolysis) rate compared to the Exo-Pol back sliding rate, *i.e.*,  $k_{3,S} \gg k_{-2,S}$  gives the same minimum error. On the other hand,  $k_{3,S} \ll k_{-2,S}$  gives  $\eta_{\text{min}} = \frac{f_1 f_p}{f_2 f_3}$ .

**The conditional mean-first-passage time.** The conditional mean first-passage times (MFPTs) to reach the respective end-states (in presence of the other) are defined in terms of the first-passage probability densities in Laplace space as

$$\tau_{R/W} = \frac{1}{\Pi_{R/W}} \left( -\frac{d\tilde{F}_{R/W,E}}{ds} \right) \Big|_{s=0} \quad [17]$$

For our purpose, the quantity of interest is  $\tau_R$ , the MFPT ('conditional' term implied) to reach the R end. We denote it simply by  $\tau$ . One can obtain analytical expressions for the MFPT for both the networks using Eq.(17). However, the exact forms come out to be quite unwieldy. To get some theoretical insights, we provide here approximate expressions. These are valid over the relevant parameter ranges, tested for both the networks. We emphasize that all the plots of the MFPTs are generated using the exact expressions.



In case of DNA replication, experimental data indicate  $k_{2,R} \ll k_{p,R}$ ,  $(1 + \eta) \approx 1$ . Then, with the limits  $k_{-1,S}, k_{-3,S} \rightarrow 0$ , we get

$$\tau_{\text{app}} = \frac{1}{k_{1,R}} - \frac{1}{(k_{-2,R} + k_{3,R})} + \frac{(k_{-2,R} + k_{3,R} + k_{p,R})}{A_1} \left( f_1 + \frac{A_2}{k_{p,R}} + \frac{k_{2,R}k_{3,R}}{A_1} \right) + \frac{f_2 f_3 k_{2,R} k_{3,R} \eta_{\text{app}}^2 A_3}{f_1 f_p^2 k_{p,R}^2 (k_{-2,W} + k_{3,W})^2}. \quad [18]$$

Here,  $A_1 = k_{p,R}(k_{-2,R} + k_{3,R})$ ,  $A_2 = \left( k_{p,R} - \frac{f_2 f_3 k_{2,R} k_{3,R} \eta_{\text{app}}}{f_p (k_{-2,W} + k_{3,W})} \right)$ ,  $A_3 = (k_{p,W} + k_{-2,W} + k_{2,W} + k_{3,W})$  and  $\eta_{\text{app}}$  is given by Eq.(8).

Kinetic data for the translation network show that  $k_{p,R} \gg k_{3,R}$ ,  $k_{p,W} \ll k_{3,W}$ ,  $(1 + \eta) \approx 1$ . Then, taking the  $k_{-2,S}, k_{-3,S} \rightarrow 0$  limit, one has

$$\tau_{\text{app}} = \frac{1}{k_{-1,R} + k_{2,R}} + \frac{1}{k_{3,R} + k_{p,R}} + \frac{(k_{-1,R} + k_{2,R})(k_{3,R} + k_{p,R}) \left( 1 + \frac{k_{1,R}}{k_{-1,R} + k_{2,R}} + \frac{k_{1,W}}{k_{-1,W} + k_{2,W}} \right)}{k_{1,R} k_{2,R} k_{p,R}} + \frac{B_1}{k_{1,R} k_{2,R} k_{p,R}} \quad [19]$$

Here,  $B_1 = k_{1,R} k_{2,R} \left( \frac{k_{3,R}}{k_{p,R}} - \frac{k_{p,R}}{k_{-1,R} + k_{2,R}} + \frac{\eta_{\text{app}}}{f_p} - \frac{\eta_{\text{app}} k_{p,R}}{k_{-1,W} + k_{2,W}} \right)$  and  $\eta_{\text{app}}$  is given by Eq.(10).

**Cost of proofreading.** The enhanced accuracy due to proofreading comes at a price. The KPR step resets the system and prevents it to take the catalytic path. Thus, hydrolysis energy of triphosphate molecules is consumed without product formation. This extra cost or cost of proofreading,  $C$  is defined as the ratio of the resetting or proofreading flux to the product-formation flux. Thus,

$$C = \frac{J_{3,R} + J_{3,W}}{J_{p,R} + J_{p,W}}. \quad [20]$$

Here,  $J_{3,S} = k_{3,S} P_{\text{ES}^*} - k_{-3,S} P_E$  ( $S = R$  or  $W$ ) is the flux associated with the proofreading step (step-3) and  $J_{p,S} = k_{p,S} P_{\text{ES}^*}$  is the flux of the catalytic step.  $P_j$  denotes the steady-state probability to find the system in state  $j$ . For the DNA replication network,  $J_{3,S} = J_{2,S}$ .

For the aa-tRNA selection network, taking the  $k_{-3,S} \rightarrow 0$  limit yields

$$C = \frac{(1 + \frac{f_3}{f_p} \eta) \frac{k_{3,R}}{k_{p,R}}}{(1 + \eta)}. \quad [21]$$

Here,  $\eta$  is defined as the ratio of the catalytic fluxes of wrong and right product. A similar simplification, however, does not produce such a compact form for the DNA replication network. We use Eq.(20) to generate the plot in Fig. 4(b) of the main text.

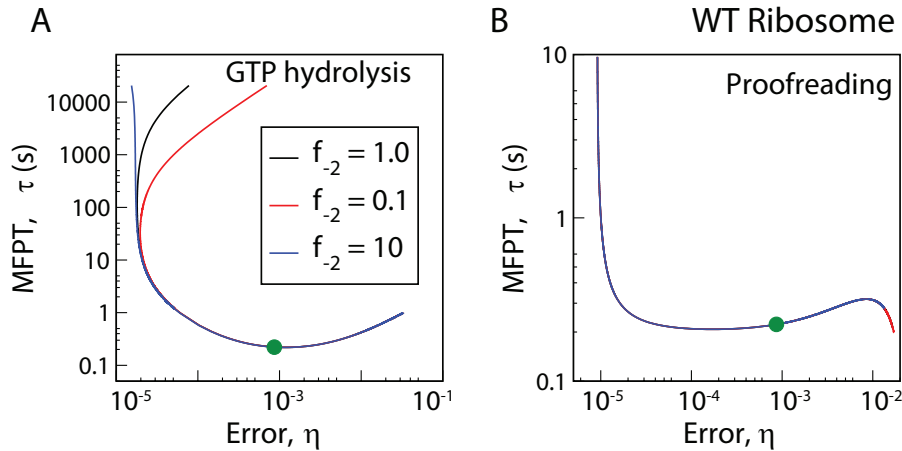

**Fig. S1.** Robustness of error-MFPT trade-off for aa-tRNA selection against change in the parameter  $f_{-2}$ . Trade-off diagrams are generated for the WT ribosome with three different values of the parameter  $f_{-2}$  for (A) the GTP hydrolysis step and (B) the proofreading step. The trade-offs remain unchanged near the relevant parameter range for the actual system (green circle,  $f_{-2} = 1.0$ ). For the GTP hydrolysis step with  $f_{-2} = 10$ , the minimum in error is attained in the  $k_{2,R} \rightarrow 0$  limit. However, this qualitative change of trend occurs far away from the region of interest. Therefore, our main conclusion about the importance of speed optimization over accuracy remains valid over relevant parameter ranges.

**Maximum speed vs accuracy curves and Pareto front.** In this section, we employ multiple parameter variation to investigate the question: What is the maximum speed for a given accuracy value for some choice of parameters? To start with, one must note that the global maximum speed available to the system is always the catalytic rate,  $k_{p,R}$ , irrespective of the value of other parameters. In other words, if one chooses to vary  $k_{p,R}$  then one can always get a higher speed at higher  $k_{p,R}$ . Hence, it is

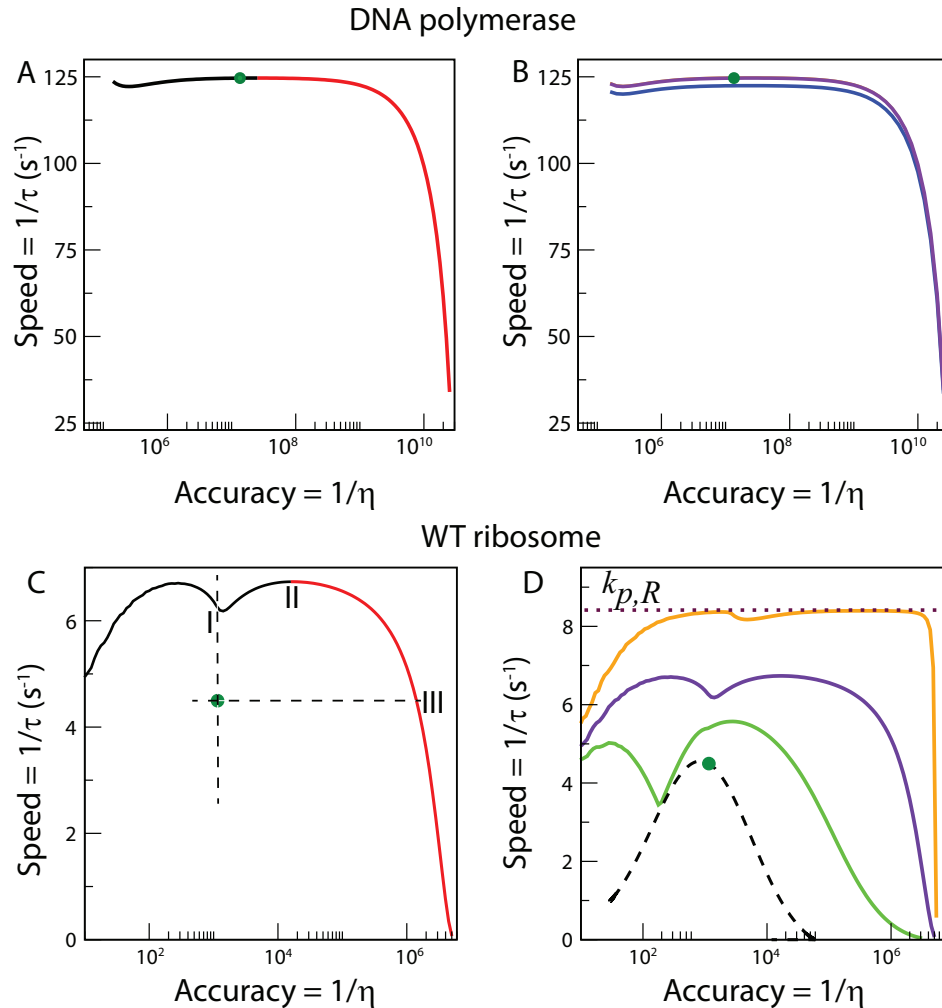

**Fig. S2.** (A) The curve of maximum speed(=  $1/\tau$ ) against accuracy(=  $1/\eta$ ) for DNA replication by T7 DNA polymerase. It is generated by varying the rate constants  $k_{-2,R}$ ,  $k_{3,R}$  over a range of  $10^{-6} - 10^6 \text{ s}^{-1}$  while  $k_{2,R}$  is evaluated at each accuracy value as a function of  $k_{-2,R}$ ,  $k_{3,R}$ ,  $\eta$  and other fixed parameters. The red portion of the curve shows a Pareto front. The position of the system is indicated with a green dot. (B) Maximum speed vs accuracy curves generated in the same manner described in panel (A). The blue curve is obtained by increasing  $k_{-1,R}$  from  $1 \text{ s}^{-1}$  to  $10 \text{ s}^{-1}$ . The violet curve is the same one as in panel (A) and redrawn for the sake of comparison. (C) The curve of maximum speed(=  $1/\tau$ ) against accuracy(=  $1/\eta$ ) for aa-tRNA selection WT *E. coli* ribosome. It is obtained by varying the rate constants  $k_{2,R}$ ,  $k_{-1,R}$  over a range of  $10^{-6} - 10^6 \text{ s}^{-1}$  while  $k_{3,R}$  is evaluated at each accuracy value as a function of  $k_{2,R}$ ,  $k_{-1,R}$ ,  $\eta$  and other fixed parameters. The red portion of the curve shows a Pareto front. The position of system is indicated with a green dot. (D) Variation of speed with accuracy for different cases of parameter variation for WT ribosome. The curve with dashed black line corresponds to the  $\eta$ - $\tau$  curve in Fig. 3A of main text and the dot on the curve shows the position of the actual system. The other three curves show the variation of the maximum speed with accuracy. The green curve is generated by determining the maximum speed for a given accuracy value by varying the rate constant  $k_{2,R}$  with  $k_{3,R}$  being evaluated as a function of  $k_{2,R}$ ,  $\eta$  and other fixed parameters. The violet curve (the same curve redrawn from panel A) and the orange curve are generated in the same manner described in panel (A). For the orange curve, we set  $k_{1,R} = 10^4 \text{ s}$ . The dotted line represents the value of the catalytic rate constant  $k_{p,R}$ , the upper boundary of speed.

reasonable to first fix the catalytic rate constant. As all the trade-off curves in the main text are determined for fixed energetic discrimination ratios  $f_i, f_p$ , here we also keep them fixed. The reverse rate constants for hydrolysis and proofreading are fixed to low values to ensure the nearly unidirectional nature of these steps.

We determine maximum speed for a given accuracy value by varying different sets of parameter. Some representative curves are shown in Fig. S2 for DNA replication and aa-tRNA selection. In Fig. S2A, the maximum speed vs accuracy curve is generated in the following manner: rate constants  $k_{-2,R}, k_{3,R}$  are varied freely over a range of  $10^{-6} - 10^6 s^{-1}$  while  $k_{2,R}$  is evaluated at each accuracy value as a function of  $k_{-2,R}, k_{3,R}, \eta$  and other fixed parameters. The red part of the curve depicts what is known as a Pareto front. By definition, over the Pareto front there is always trade-off between maximum speed and accuracy. All the points over the rest of the curve (and inside) have either lower accuracy or lower speed or both compared to those comprising the Pareto front. It is evident from Fig. S2A that, the actual system lies very close to the maximum speed boundary as well as the Pareto front. The system can increase its accuracy without compromising much in speed by moving onto the Pareto front. However, the cost factor restricts such a strategy similar to the case shown in Fig. 4 of the main text. In Fig. S2B, the blue curve is obtained by increasing  $k_{-1,R}$  from  $1 s^{-1}$  to  $10 s^{-1}$ ; the violet curve is the same as in Fig. S2A and redrawn for comparison. As expected, the maximum speed for the blue curve is lower but it is still fairly close to the violet one. On the other hand, decreasing  $k_{-1,R}$  has very little effect on the maximal speed vs accuracy curve and the Pareto front. Hence, the proximity of the system to the maximum speed and the Pareto front is a robust feature.

The maximum speed vs accuracy curves for WT ribosome are shown in Fig. S2C,D. They are generated in the following manner: rate constants  $k_{2,R}, k_{-1,R}$  are varied freely over a range of  $10^{-6} - 10^6 s^{-1}$  while  $k_{3,R}$  is evaluated at each accuracy value as a function of  $k_{2,R}, k_{-1,R}, \eta$  and other fixed parameters. The actual system lies inside the Pareto front and is relatively close to the maximum speed but not to the maximum accuracy. In Fig. S2D, similar cases of parameter variation are depicted (for details, see caption). The data in Fig. 3A of the main text is also included for comparison. The maximum speed curve goes very close to the upper boundary when we set the rate constant  $k_{1,R}$  to a large value ( $= 10^4 s^{-1}$ , orange curve in Fig. S2D). It is expected as increase in  $k_{1,R}$  helps to increase the speed as already shown in Fig. 3B of the main text. Thus, even if we were to include  $k_{1,R}$  in our multi-parameter variation, the maximum speed is expected to arise at the upper boundary of the range of  $k_{1,R}$ . Now, it is crucial to figure out what are the actual parameter values for some suitably-chosen points on the maximum speed vs accuracy curves. For this purpose, we consider the curve in Fig. S2C and pick three points on the curve as follows: I. with accuracy equal to that of the system; II. the maximum of the maximum speed vs accuracy curve and III. with maximum speed equal to that of the system. The corresponding parameter values are listed in Table S5. It is evident from the data that all three positions are unrealistic for the system to reside on, particularly in the light of experimentally measured kinetic constants (see Table S2). It is important to note that, as the system lies inside the Pareto front, one can not rule out the possibility of improving both speed and accuracy with affordable cost. However, it is not quite clear what additional physical and/or biochemical constraints could keep the system away from the Pareto front.

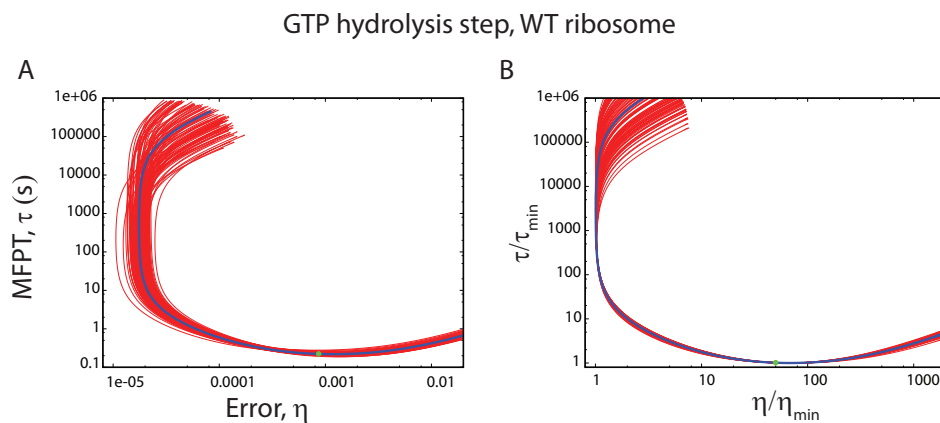

**Fig. S3.** Robustness of the error-MFPT trade-off for the GTP hydrolysis step with respect to random variation of various rate constants. The factors  $f_i, f_p$  are kept fixed. The rate constants  $k_{-2,R}, k_{-3,R}$  are varied in the range  $10^{-3} - 10^{-5}$  by sampling from a log-uniform distribution. Other rate constants are sampled from a Gaussian distribution with the standard deviation equal to the experimental error bars in the kinetic data of Zaher *et al* [Zaher HS, Green R (2010) Molecular Cell 39(1):110–120]. (A) Bunch of trade-off curves generated from random sampling. The blue curve shows the trade-off with no errors and the green circle shows the system's position. (B) Trade-off curves generated by scaling error and MFPT values of each curve with their respective minimum. It is evident from the plots that the preference of the system to achieve maximum speed rather than maximum accuracy is quite robust against parameter fluctuations.



**Table S1. Model parameters for DNA replication by T7 DNAP**

| Parameter  | Value ( $s^{-1}$ ) | Parameter | Value                |
|------------|--------------------|-----------|----------------------|
| $k_{1,R}$  | 250                | $f_1$     | $8 \times 10^{-6}$   |
| $k_{-1,R}$ | 1                  | $f_{-1}$  | $1 \times 10^{-5}$   |
| $k_{2,R}$  | 0.2                | $f_2$     | 11.5                 |
| $k_{-2,R}$ | 700                | $f_{-2}$  | 1                    |
| $k_{3,R}$  | 900                | $f_3$     | 1                    |
| $k_{p,R}$  | 250                | $f_p$     | $4.8 \times 10^{-5}$ |

**Table S2. Model parameters for aa-tRNA selection by WT *E. coli* ribosome**

| Parameter  | Value ( $s^{-1}$ )   | Parameter | Value                |
|------------|----------------------|-----------|----------------------|
| $k_{1,R}$  | 40                   | $f_1$     | 0.675                |
| $k_{-1,R}$ | 0.5                  | $f_{-1}$  | 94                   |
| $k_{2,R}$  | 25                   | $f_2$     | $4.8 \times 10^{-2}$ |
| $k_{3,R}$  | $8.5 \times 10^{-2}$ | $f_3$     | 7.9                  |
| $k_{p,R}$  | 8.415                | $f_p$     | $4.2 \times 10^{-3}$ |

**Table S3. Model parameters for aa-tRNA selection by hyper-accurate (HYP, *rpsL141*) mutant *E. coli* ribosome**

| Parameter  | Value ( $s^{-1}$ )   | Parameter | Value                |
|------------|----------------------|-----------|----------------------|
| $k_{1,R}$  | 27                   | $f_1$     | 0.926                |
| $k_{-1,R}$ | 0.41                 | $f_{-1}$  | 112.2                |
| $k_{2,R}$  | 14                   | $f_2$     | $3.5 \times 10^{-2}$ |
| $k_{3,R}$  | $4.8 \times 10^{-2}$ | $f_3$     | 10.34                |
| $k_{p,R}$  | 4.752                | $f_p$     | $7.4 \times 10^{-4}$ |

**Table S4. Model parameters for aa-tRNA selection by more-erroneous (ERR, *rpsD12*) mutant *E. coli* ribosome**

| Parameter  | Value ( $s^{-1}$ )   | Parameter | Value                |
|------------|----------------------|-----------|----------------------|
| $k_{1,R}$  | 37                   | $f_1$     | 0.973                |
| $k_{-1,R}$ | 0.43                 | $f_{-1}$  | 9.3                  |
| $k_{2,R}$  | 31                   | $f_2$     | 0.126                |
| $k_{3,R}$  | $7.7 \times 10^{-2}$ | $f_3$     | 7.65                 |
| $k_{p,R}$  | 7.623                | $f_p$     | $4.1 \times 10^{-3}$ |

**Table S5. Parameter values corresponding to the three points on the maximum speed vs accuracy curve in Fig. S2A for WT *E. coli* ribosome. All the rate constants are in  $s^{-1}$ .**

| Point | $k_{-1,R}$        | $k_{2,R}$         | $k_{3,R}$            |
|-------|-------------------|-------------------|----------------------|
| I     | $5.6 \times 10^5$ | $10^6$            | $3.3 \times 10^{-4}$ |
| II    | $6.1 \times 10^5$ | $10^6$            | 0.51                 |
| III   | $10^6$            | $9.6 \times 10^5$ | 8.7                  |
